# Supplementary material for: Prevalence of Class V Carious Lesions among Tehran Residents and Lifestyle Habits of the Affected Individuals: A Cross-Sectional Study
Source: Research Square preprint supplement (doi:10.21203/rs.3.rs-8050185/v1), 2025-12-15
Supplement: Supplementary file 1 [file 8060bd76be1ee361ae42faf1.pdf]

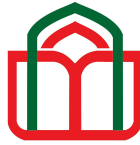

shahed university

## Research Ethics Committees Certificate

|                     |                                                                                                                                                                                                                                                                                                                                                                                                                                                                                                                                                                                                                                           |                |            |
|---------------------|-------------------------------------------------------------------------------------------------------------------------------------------------------------------------------------------------------------------------------------------------------------------------------------------------------------------------------------------------------------------------------------------------------------------------------------------------------------------------------------------------------------------------------------------------------------------------------------------------------------------------------------------|----------------|------------|
| Approval ID:        | IR.SHAHED.REC.1403.120                                                                                                                                                                                                                                                                                                                                                                                                                                                                                                                                                                                                                    | Approval Date: | 2025-02-03 |
| Evaluated by:       | Research Ethics Committees of shahed university                                                                                                                                                                                                                                                                                                                                                                                                                                                                                                                                                                                           |                |            |
| Status:             | Approved                                                                                                                                                                                                                                                                                                                                                                                                                                                                                                                                                                                                                                  |                |            |
| Approval Statement: | <p>The project was found to be in accordance to the ethical principles and the national norms and standards for conducting Medical Research in Iran.</p> <p>Notice:</p> <ol style="list-style-type: none"><li>1. Although the proposal has been approved by the Biomedical Research Ethics Committee, meeting the professional and legal requirements is the sole responsibility of the PI and other project collaborators.</li><li>2. This certificate is reliant on the proposal/documents received by this committee on 2025-02-03. The committee must be notified by the PI as soon as the proposal/documents are modified.</li></ol> |                |            |
| Thesis Title:       | Evaluating the prevalence of Class V caries lesions and investigating the some habits and lifestyle of affected people in Tehran                                                                                                                                                                                                                                                                                                                                                                                                                                                                                                          |                |            |
| Supervisor:         | Name: Syed masoud Sajedi<br>Email: s.sajedi@shahed.ac.ir                                                                                                                                                                                                                                                                                                                                                                                                                                                                                                                                                                                  |                |            |
| Student:            | Name: Seyed amir mohsen Mousavi naeini<br>Email: amiemohsen.apple@gmail.com                                                                                                                                                                                                                                                                                                                                                                                                                                                                                                                                                               |                |            |

  
Dr. Ahmad Cheldavi  
Committee Director  
shahed university

  
Dr. Shamsa Bijani  
Committee Secretary  
shahed university
